# Supplementary material
Source: PubMed Central journal article supplement (PMC6863285)
Supplement: 42770_2019_101_MOESM1_ESM.pdf [file 42770_2019_101_MOESM1_ESM.pdf]

## Supplementary Material

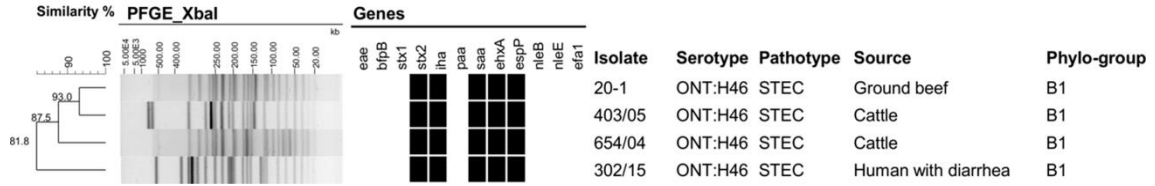

**Fig. S1.** Dendrogram showing the relationship among four STEC ONT:H46, isolated from ground beef, human or cattle. Additional information, such as: assignment of the STEC isolates in the distinct phylo-group, and occurrence of virulence factor-encoding genes (*eae*, *bfpB*, *stx1*, *stx2*, *iha*, *paa*, *saa*, *ehxA*, *espP*, *nleB*, *nleE* and *efa1/lifA*) are also described in this figure.
